# Supplementary figures and images for: Introducing novel electronic and magnetic properties in C3N nanosheets by defect engineering and atom substitution
Source: Royal Society of Chemistry journal article supplement (doi:10.1039/c9cp03853a), 2019-01-01

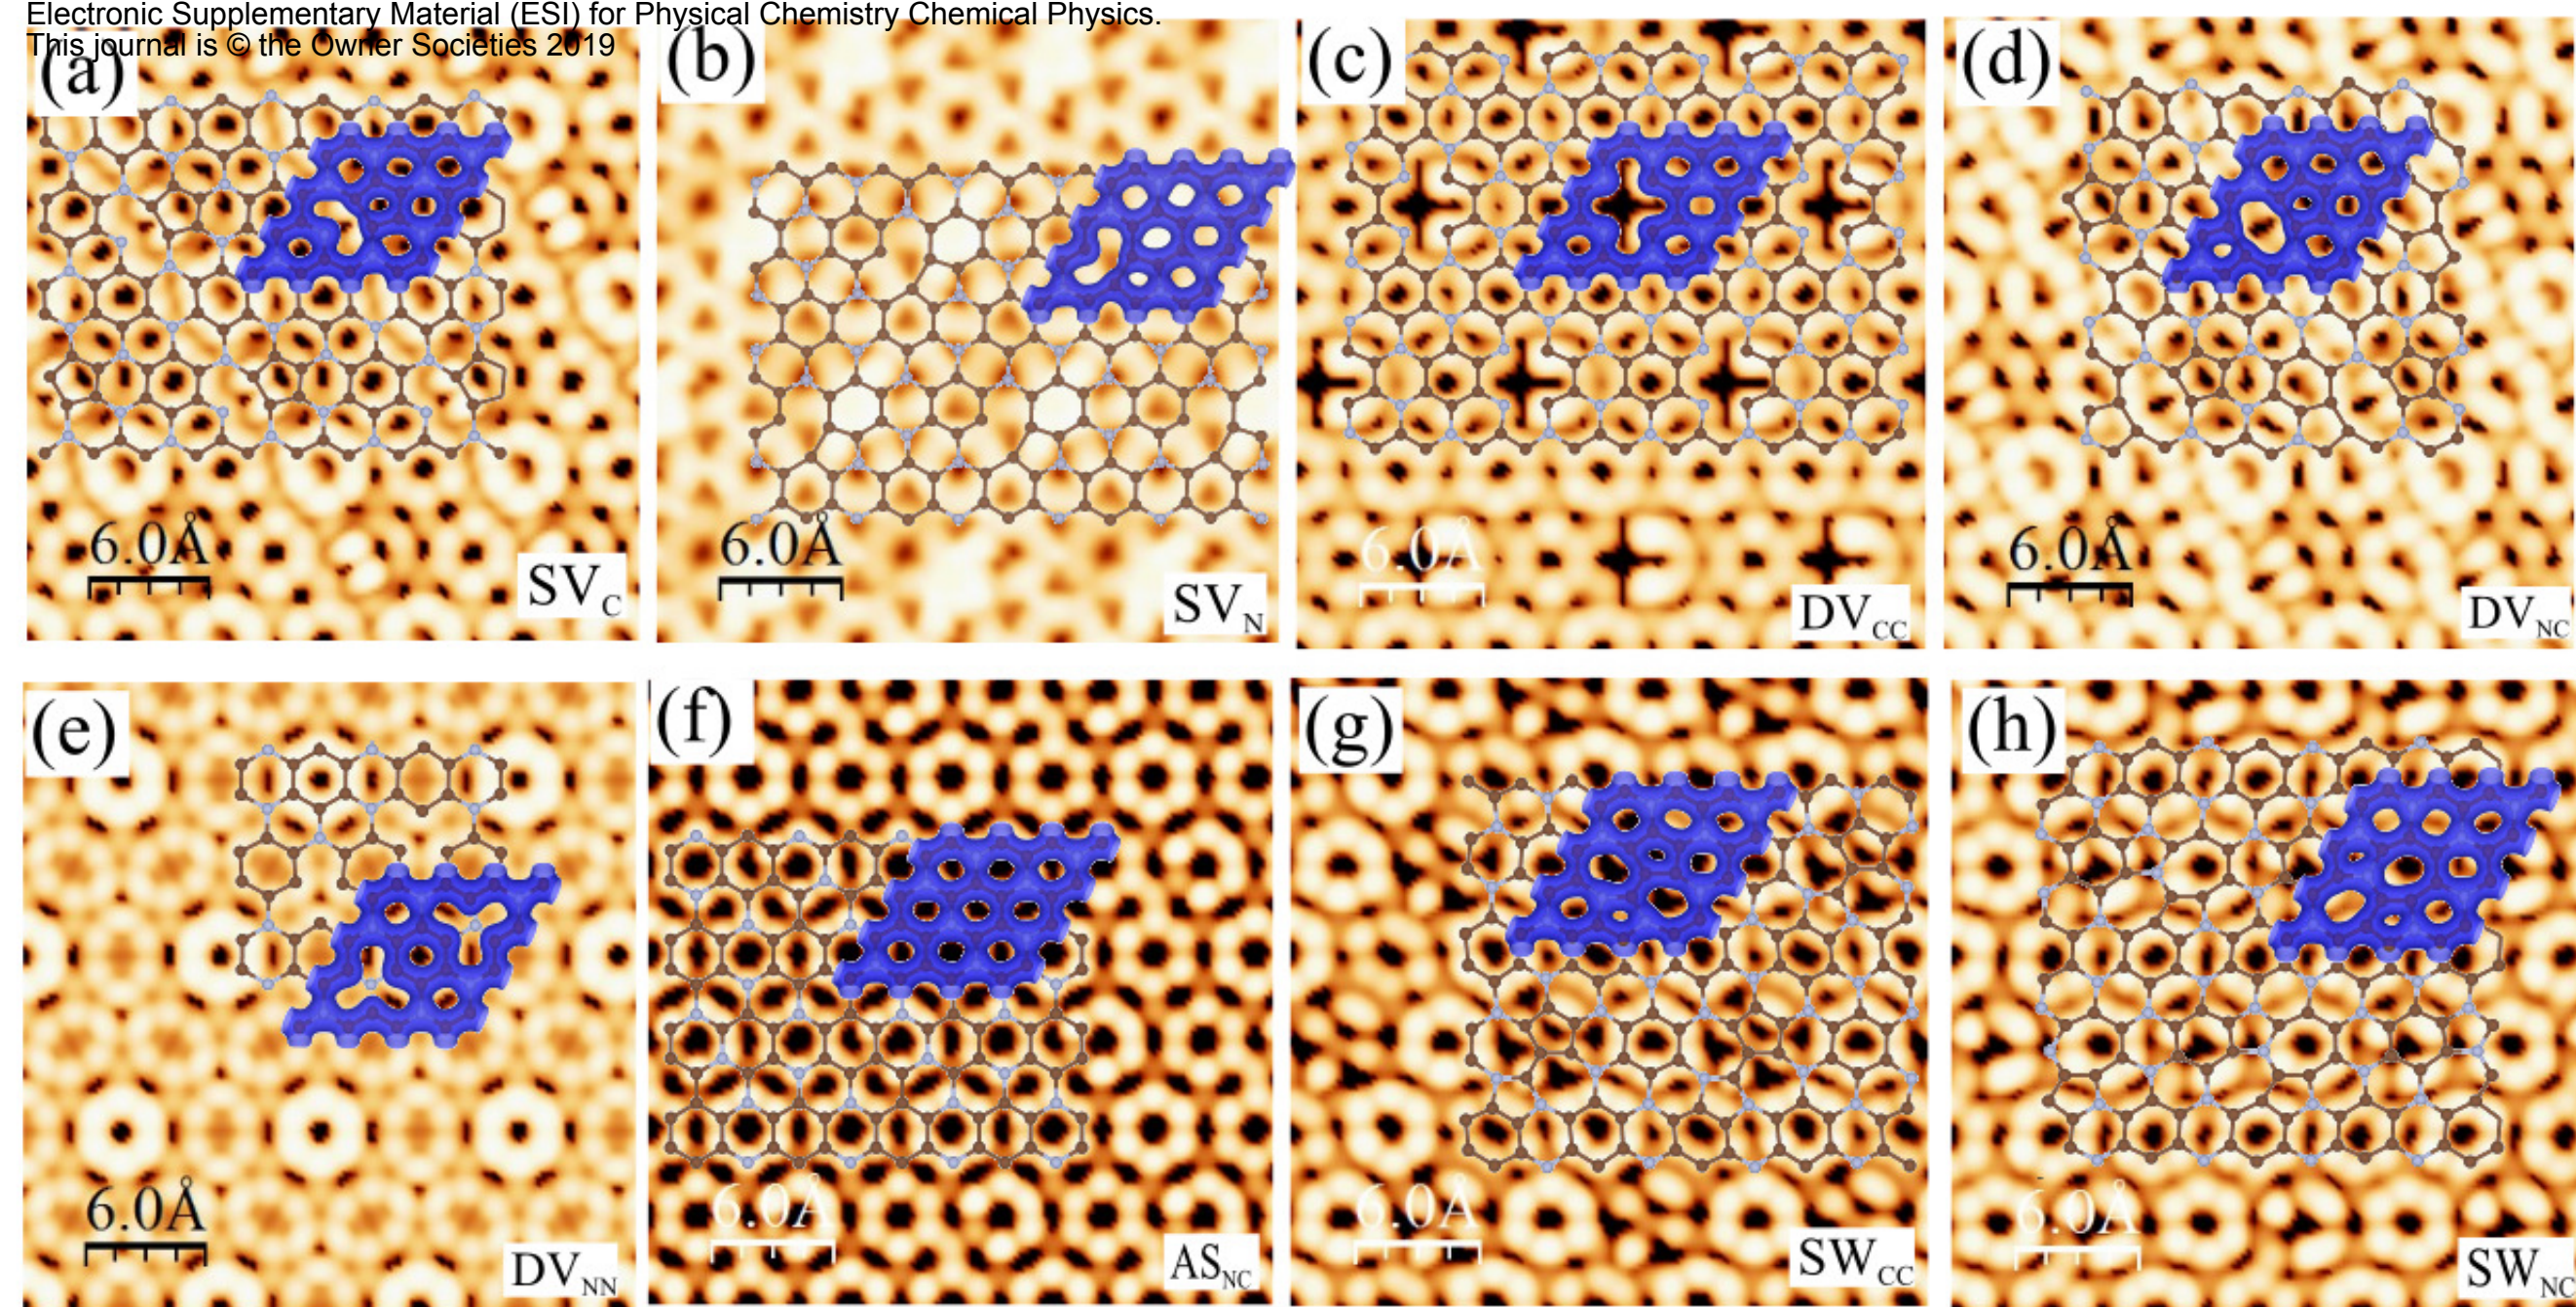

Supplement: c9cp03853a1.pdf [file c9cp03853a1.pdf]

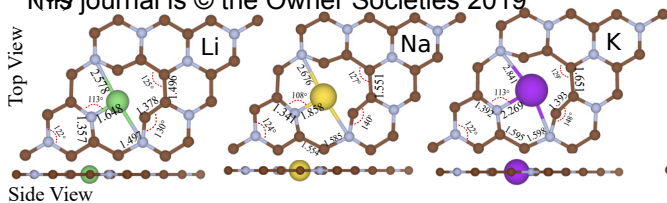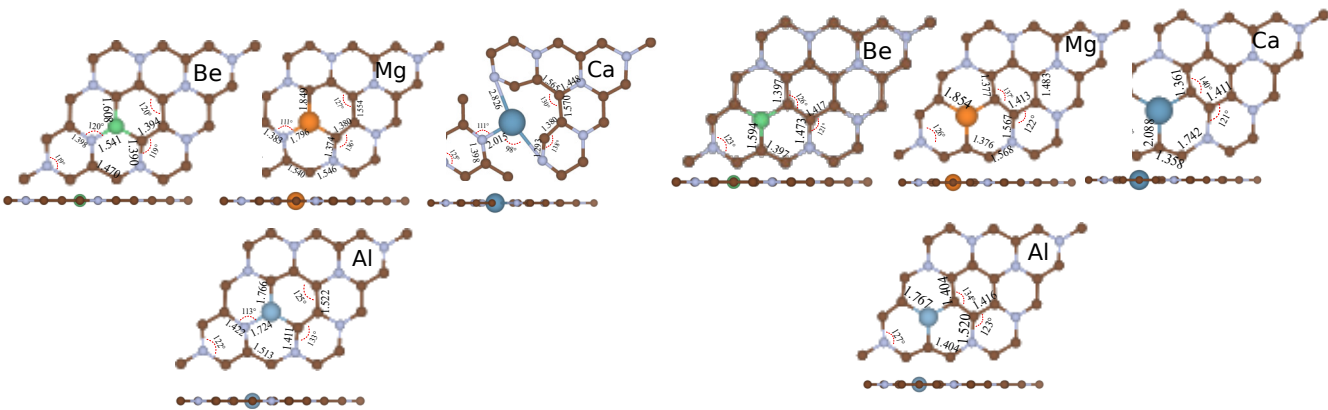

Supplement: c9cp03853a2.pdf [file c9cp03853a2.pdf]
